# Supplementary material for: Problems in measuring the JTC-bias in patients with psychotic disorders with the fish task: A secondary analysis of a baseline assessment of a randomized controlled trial&nbsp;
Source: Research Square preprint supplement (doi:10.21203/rs.3.rs-18581/v3), 2020-11-03
Supplement: Supplementary file 1 [file dd09186f0353d49d09452f2f.docx]

**Additional Information regarding the shortened dataset**

Dataset: Problems in measuring the JTC-bias in patients with psychotic disorders with the fish task: A secondary analysis of a baseline assessment of a randomized controlled trial

To ensure complete anonymization of the data set made available online, some of the variables used in the study were removed from the data set we provide on this papers’ project page on the OSF. However, in individual cases and after consultation with the responsible data protection manager, the first author may provide a data set with additional (mainly socio-demographic) variables, if these are needed, for example, in the context of meta-analyses.

If you are interested in a data set with additional variables, please contact the first author. Please use the following contact information: nico.pytlik@staff.uni-marburg.de

The following variables are included in the analyses, but due to possible data protection concerns they are only issued on request and after consultation with a data protection manager:

- Diagnosis (Schizophrenia; schizoaffective disorder; delusional disorder; schizophreniform disorder)
- Gender
- Education Level
- Age
- IQ

The following potentially relevant variables were also collected but are not included in the analyses:

- JTC measures (second measuring point)
- PANSS measures (second measuring point)
- PSYRATS Auditory Hallucinations Subscale (first measuring point)
- PSYRATS (second measuring point)

The following variables are not made public in order to ensure the complete anonymity of the study participants:

- Duration of the episode
- Duration of the disorder
- Age at onset of the disorder
- Study center
- Initials
- Date of birth
- Education level of the father
- Education level of the mother

In addition, the POSITIVE study included other test procedures that are not relevant to the present study. As these data are not related to the present study and may be used in further publications, they will not be made publicly available at this point.
